# Supplementary material
Source: publisher figshare collection journal article supplement (https://acs.figshare.com/ndownloader/files/4176469)
Supplement: Supplementary file 1 [file 4176469]

## Supporting Information

### A Turn-on Fluorescent Sensor for Selective Detection of $\text{Zn}^{2+}$ , $\text{Cd}^{2+}$ , and $\text{Hg}^{2+}$ in Water

Meng Li,<sup>a,b</sup> Hai-Yan Lu,<sup>b,\*</sup> Rui-Li Liu,<sup>b</sup> Jun-Dao Chen,<sup>a</sup> and Chuan-Feng Chen<sup>a,\*</sup>

<sup>a</sup>Beijing National Laboratory for Molecular Sciences, CAS Key Laboratory of Molecular Recognition and Function, Institute of Chemistry, Chinese Academy of Sciences, Beijing 100190, China. <sup>b</sup>Graduate University of Chinese Academy of Sciences, Beijing 100049, China.

cchen@iccas.ac.cn; haiyanlu@gucas.ac.cn

### Contents

|                                                                                                           |    |
|-----------------------------------------------------------------------------------------------------------|----|
| 1. The pH Responses of Receptor 1-----                                                                    | S2 |
| 2. Job's Plot of Receptor 1 and $\text{Zn}^{2+}$ -----                                                    | S2 |
| 3. Fluorescent Titrations of Receptor 1 with $\text{Zn}^{2+}$ -----                                       | S3 |
| 4. Job's Plot of Receptor 1 and $\text{Cd}^{2+}$ -----                                                    | S3 |
| 5. Fluorescent Titrations of Receptor 1 with $\text{Cd}^{2+}$ -----                                       | S4 |
| 6. Job's Plot of Receptor 1 and $\text{Hg}^{2+}$ -----                                                    | S4 |
| 7. Fluorescent Titrations of Receptor 1 with $\text{Hg}^{2+}$ -----                                       | S5 |
| 8. Absorption Titrations of Receptor 1 with Metal Ions -----                                              | S6 |
| 9. $^1\text{H}$ NMR Titrations of Receptor 1 in the Presence of $\text{Zn}^{2+}$ , $\text{Cd}^{2+}$ ----- | S7 |
| 10. $^1\text{H}$ NMR and $^{13}\text{C}$ NMR Spectra of Compounds 1 and 2-----                            | S8 |

## 1. The pH Responses of Receptor 1

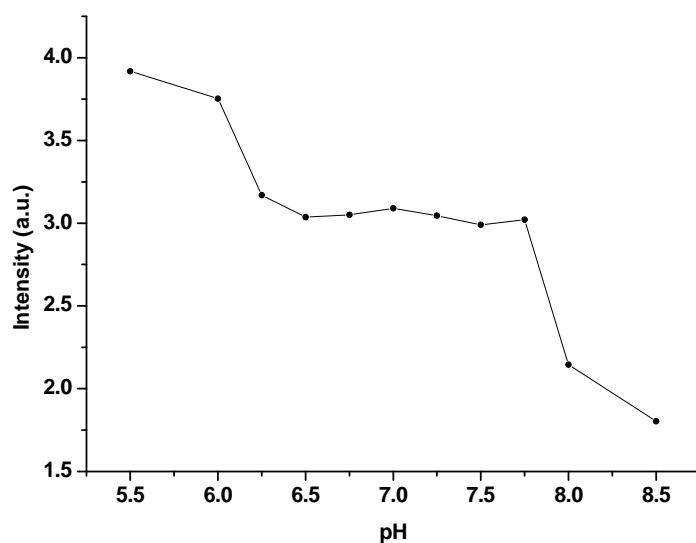

**Figure S1.** Effect of pH on the fluorescence intensity at 435 nm of receptor **1** ( $1.0 \times 10^{-5}$  M) in buffer solution. The pH of solution was adjusted by aqueous solution of NaOH (1.0 M) and HCl (1.0 M).  $\lambda_{\text{ex}} = 330$  nm,  $\lambda_{\text{em}} = 435$  nm.

## 2. Job's Plot of Receptor 1 and $\text{Zn}^{2+}$

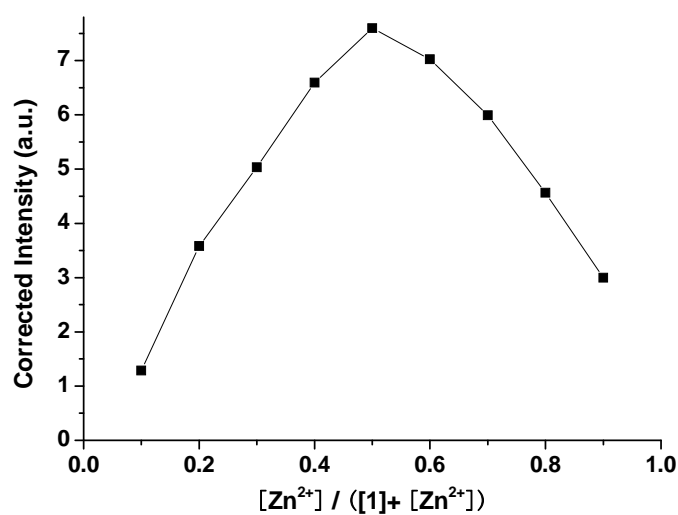

**Figure S2.** Job's plot of receptor **1** and  $\text{Zn}^{2+}$ . The total concentration of **1** and  $\text{Zn}^{2+}$  was kept at 10  $\mu\text{M}$  in HEPES (10.0 mM, pH = 7.2).  $\lambda_{\text{ex}} = 330$  nm,  $\lambda_{\text{em}} = 435$  nm.

### 3. Fluorescent Titrations of Receptor 1 with $\text{Zn}^{2+}$

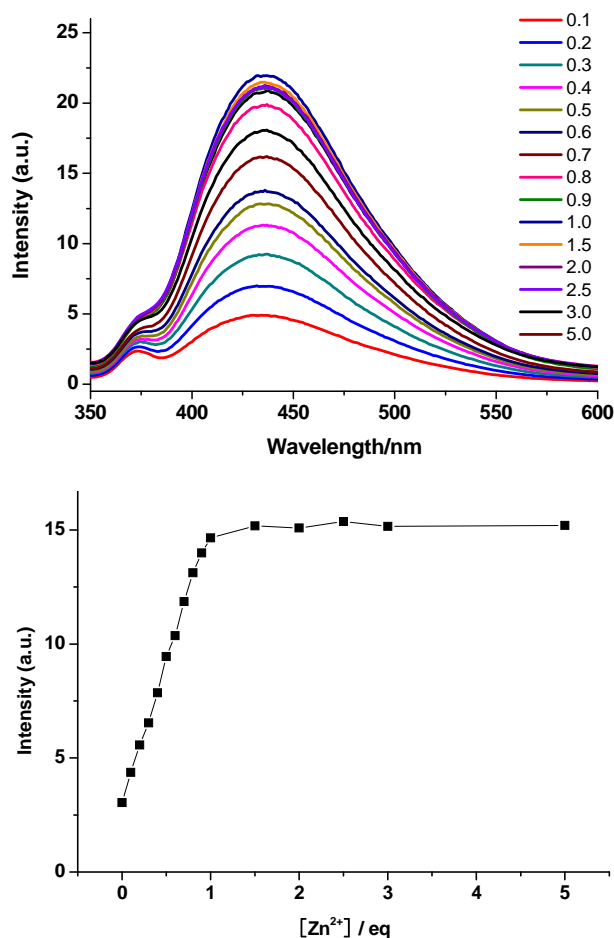

**Figure S3.** Up: emission spectra ( $\lambda_{\text{ex}} = 330 \text{ nm}$ ) of **1** ( $1.0 \times 10^{-5} \text{ M}$ ) in the presence of  $\text{Zn}^{2+}$  in HEPES (10.0 mM, pH = 7.2) at  $25^\circ\text{C}$ . Down: the fluorescence intensity of **1** at 435 nm vs. the number of equivalents of  $\text{Zn}^{2+}$  added.

### 4. Job's Plot of Receptor 1 and $\text{Cd}^{2+}$

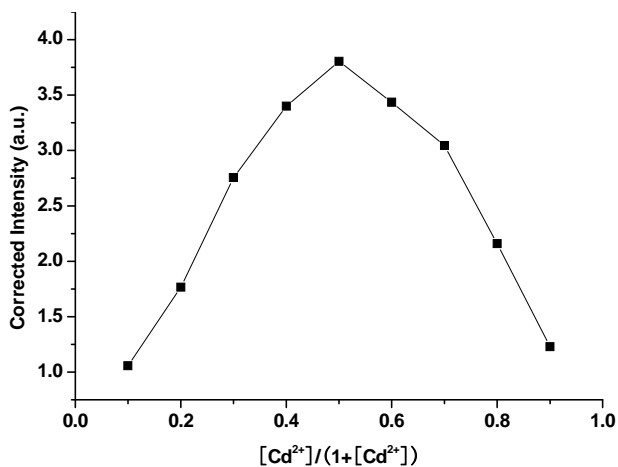

**Figure S4.** Job's plot of receptor **1** and  $\text{Cd}^{2+}$ . The total concentration of **1** and  $\text{Cd}^{2+}$  were kept at  $10 \mu\text{M}$  in HEPES (10.0 mM, pH = 7.2).  $\lambda_{\text{ex}} = 330 \text{ nm}$ ,  $\lambda_{\text{em}} = 435 \text{ nm}$ .

## 5. Fluorescent Titrations of Receptor 1 with $\text{Cd}^{2+}$

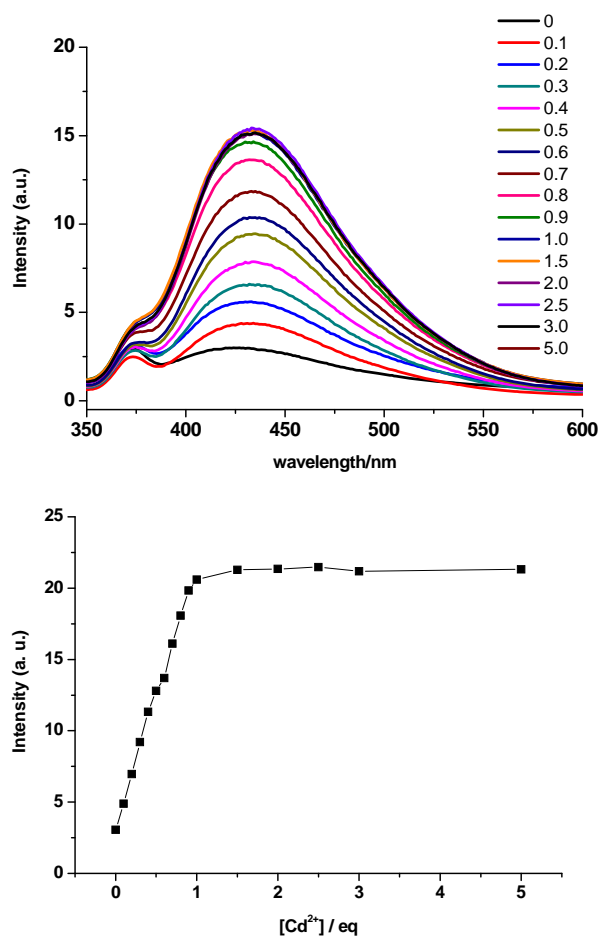

**Figure S5.** Up: emission spectra ( $\lambda_{\text{ex}} = 330$  nm) of **1** ( $1.0 \times 10^{-5}$  M) in the presence of  $\text{Cd}^{2+}$  in HEPES (10.0 mM, pH = 7.2) at 25°C. Down: the fluorescence intensity of **1** at 435 nm vs. the number of equivalents of  $\text{Cd}^{2+}$  added.

## 6. Job's Plot of Receptor 1 and $\text{Hg}^{2+}$

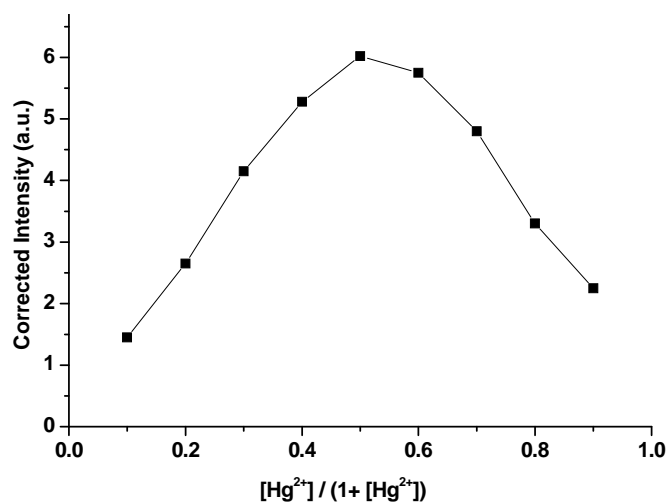

**Figure S6.** Job's plot of receptor **1** and  $\text{Hg}^{2+}$ . The total concentration of **1** and  $\text{Hg}^{2+}$  were kept at 10  $\mu\text{M}$  in HEPES (10.0 mM, pH = 7.2).  $\lambda_{\text{ex}} = 330$  nm,  $\lambda_{\text{em}} = 435$  nm.

## 7. Fluorescent Titrations of Receptor 1 with $\text{Hg}^{2+}$

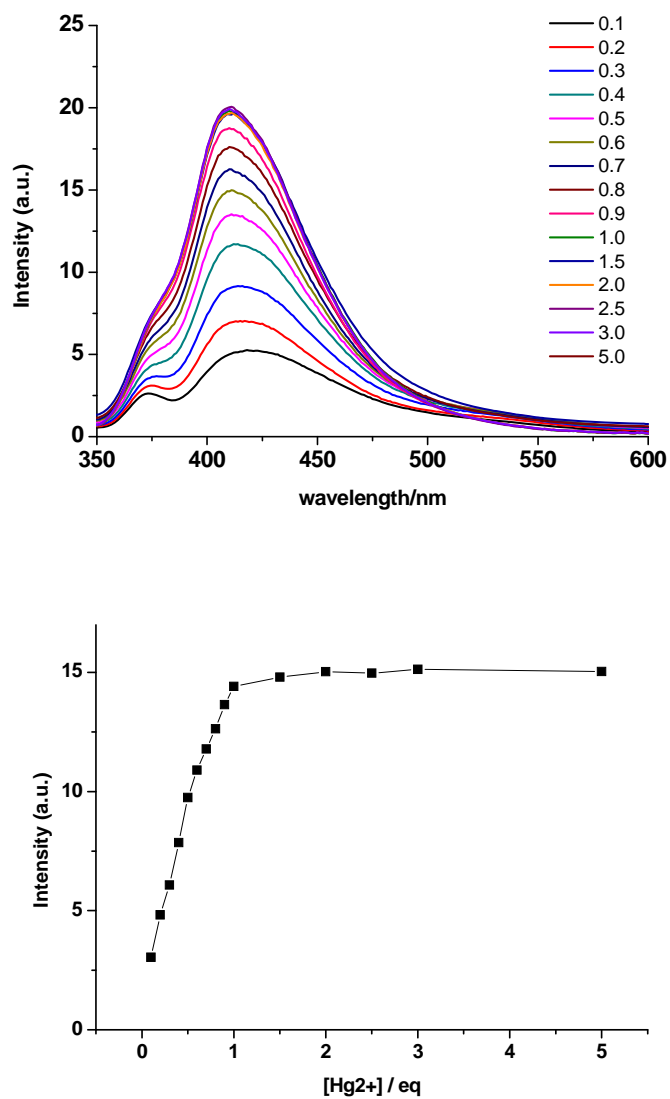

**Figure S7.** Up: emission spectra ( $\lambda_{\text{ex}} = 330$  nm) of **1** ( $1.0 \times 10^{-5}$  M) in the presence of  $\text{Hg}^{2+}$  in HEPES (10.0 mM, pH = 7.2) at 25°C. Down: the fluorescence intensity of **1** at 410 nm vs. the number of equivalents of  $\text{Hg}^{2+}$  added.

## 8. Absorption Titrations of Receptor 1 with Metal Ions

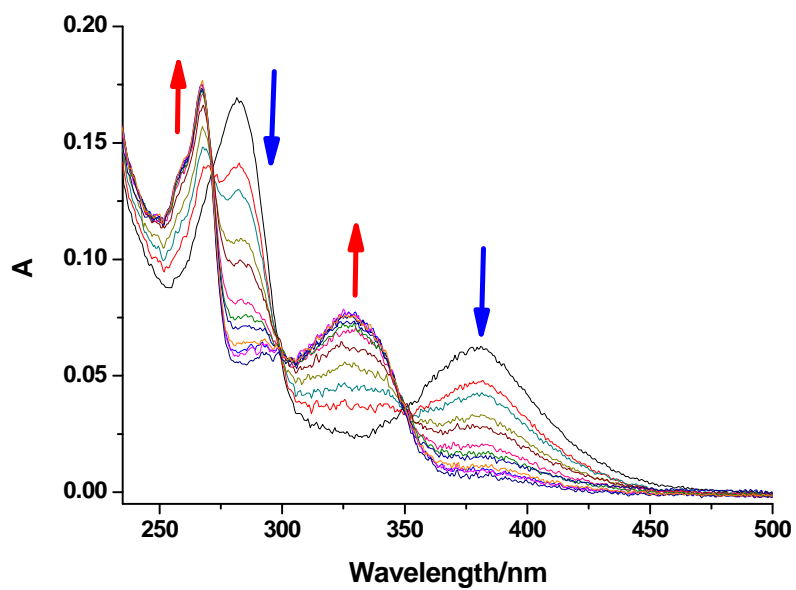

**Figure S8.** Absorption spectra of receptor **1** ( $1.0 \times 10^{-5}$  M) in HEPES (10.0 mM, pH = 7.2) to various concentrations of  $\text{Zn}^{2+}$ .

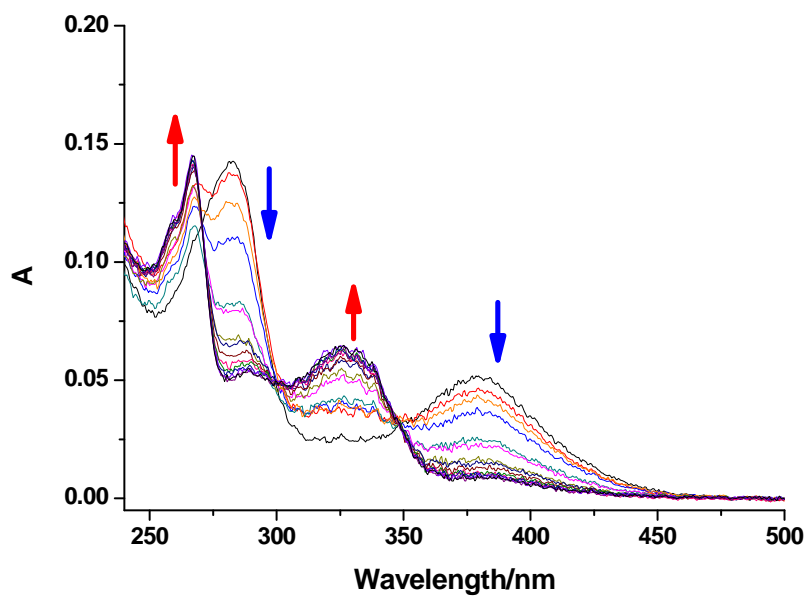

**Figure S9.** Absorption spectra of receptor **1** ( $1.0 \times 10^{-5}$  M) in HEPES (10 mM, pH = 7.2) to various concentrations of  $\text{Cd}^{2+}$ .

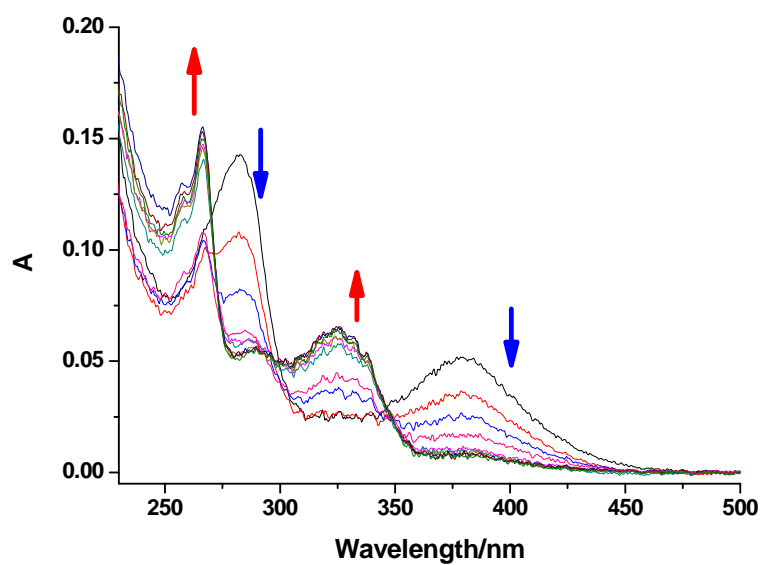

**Figure S10.** Absorption spectra of receptor **1** ( $1.0 \times 10^{-5}$  M) in HEPES (10 mM, pH = 7.2) to various concentrations of  $\text{Hg}^{2+}$ .

### 9. $^1\text{H}$ NMR Titration of Receptor **1** in the Presence of Metal Ions

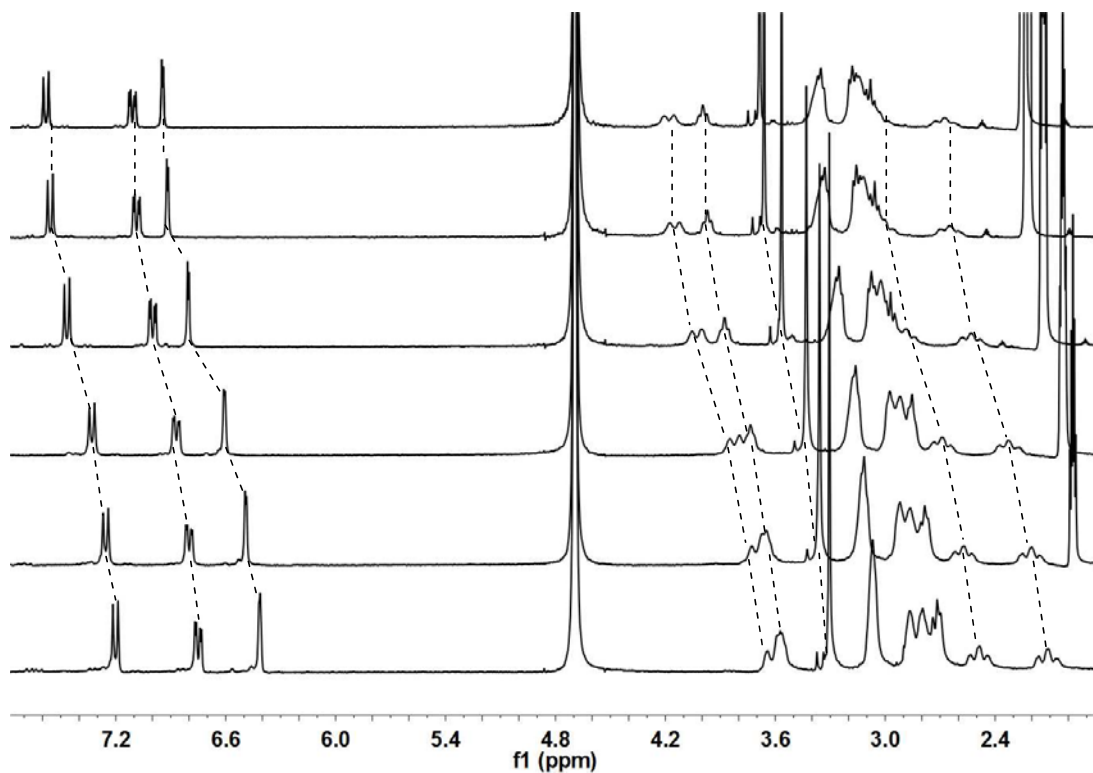

**Figure S11.** Partial  $^1\text{H}$  NMR spectra of **1** in the presence of  $\text{Cd}^{2+}$  (from down to up: 0, 0.25, 0.5, 0.75, 1.0, and 2.0 equiv.) in  $\text{D}_2\text{O}$ .

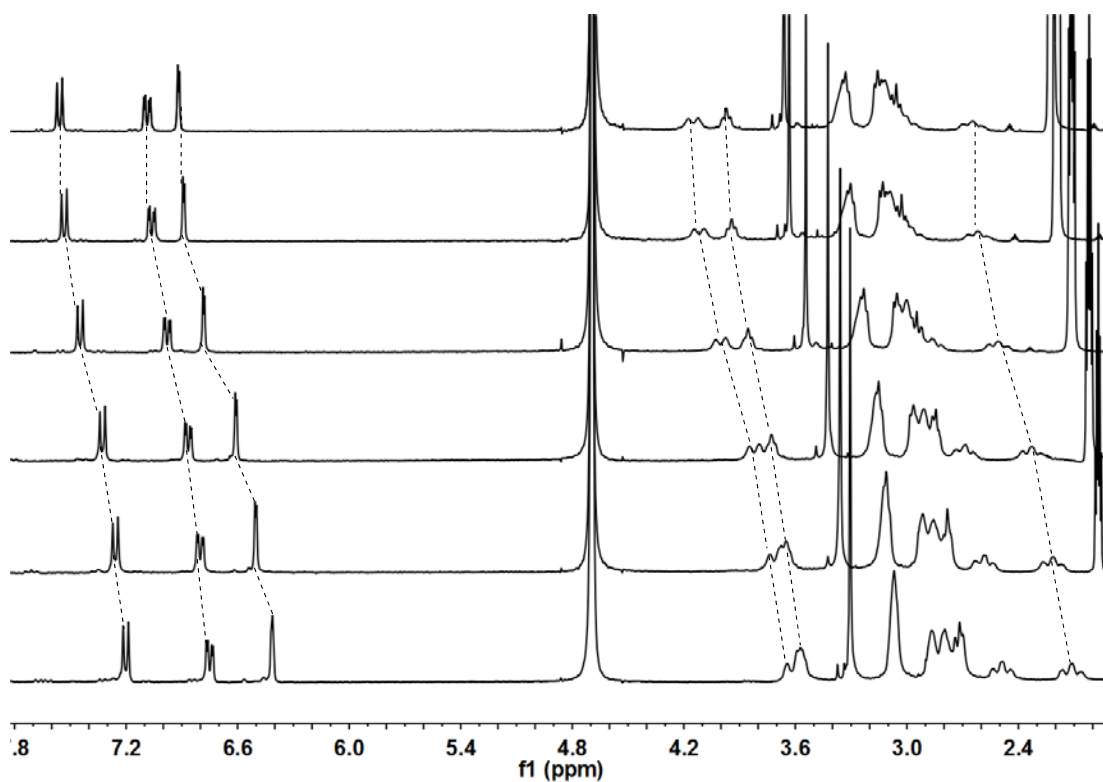

**Figure S12.** Partial  $^1\text{H}$  NMR spectra of **1** in the presence of  $\text{Zn}^{2+}$  (from down to up: 0, 0.25, 0.5, 0.75, 1.0, and 2.0 equiv.) in  $\text{D}_2\text{O}$ .

## 10. Copies of $^1\text{H}$ NMR and $^{13}\text{C}$ NMR Spectra of New Compounds

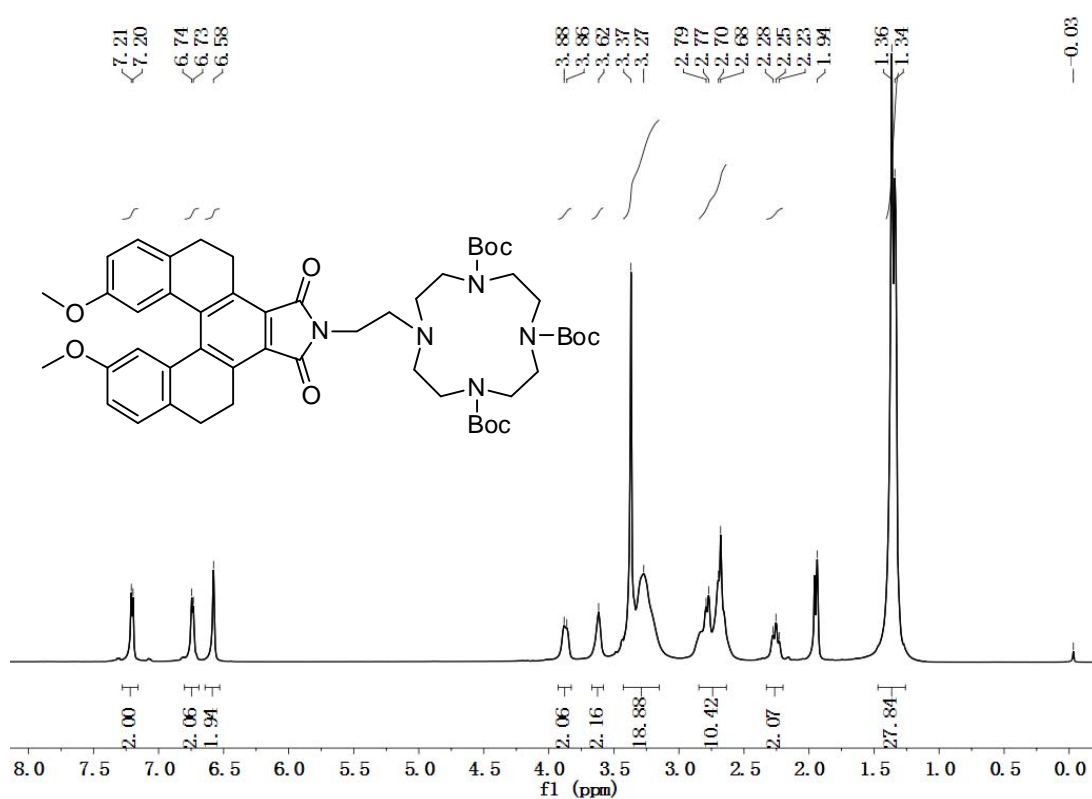

**Figure S13.**  $^1\text{H}$  NMR spectrum ( $\text{CD}_3\text{CN}$ , 300 MHz) of **2**.



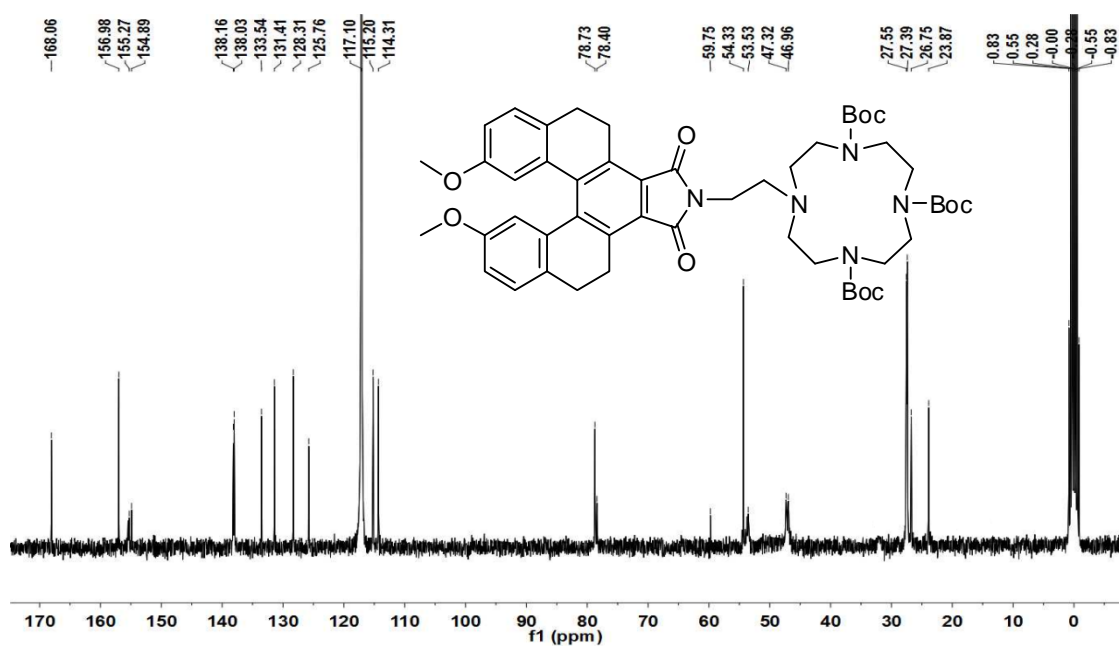

Figure S14. <sup>13</sup>C NMR spectrum (CD<sub>3</sub>CN, 75 MHz) of **2**.

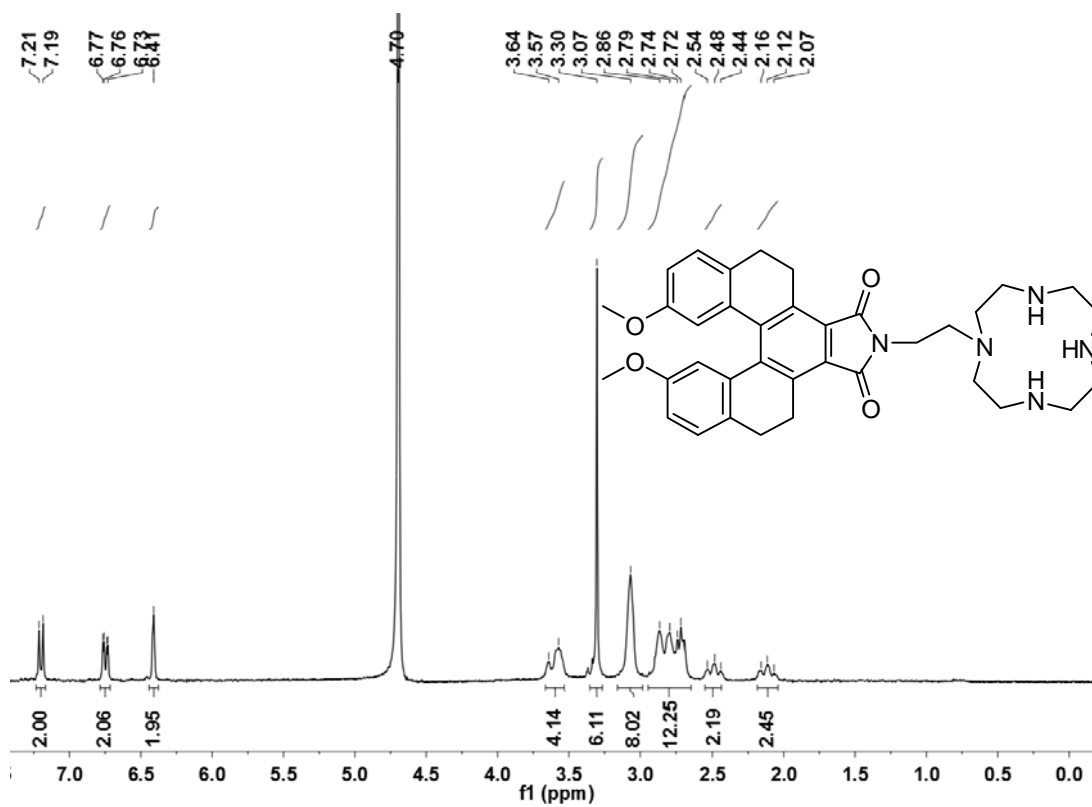

Figure S15. <sup>1</sup>H NMR spectrum (D<sub>2</sub>O, 300 MHz) of **1**.

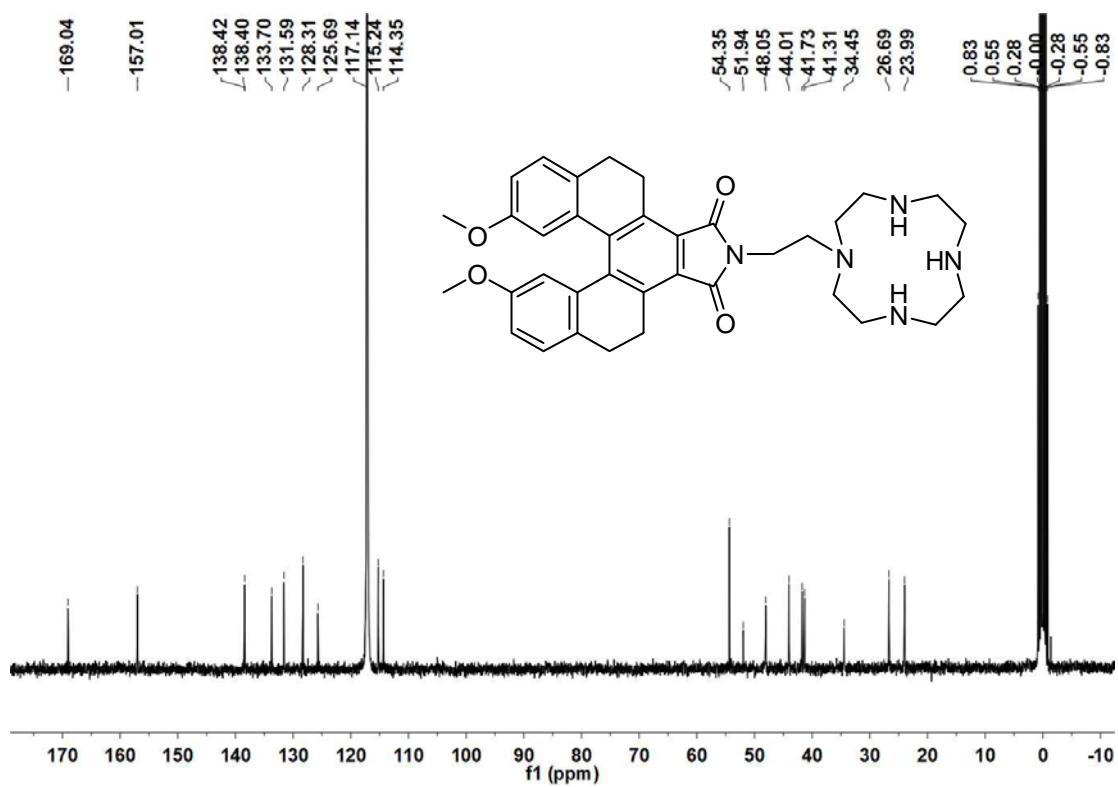

**Figure S16.**  $^{13}\text{C}$  NMR spectrum ( $\text{CD}_3\text{CN}$ , 75 MHz) of **1**.
